# Supplementary material
Source: PubMed Central journal article supplement (PMC4005358)
Supplement: NIHMS565364-supplement-Figures__Tables__Other_Information.pdf [file NIHMS565364-supplement-Figures__Tables__Other_Information.pdf]

## Supplemental Information

### The Cancer-Associated *FGFR4-G388R*

### Polymorphism Enhances Pancreatic Insulin

### Secretion and Modifies the Risk of Diabetes

Shereen Ezzat, Lei Zheng, Jose C. Florez, Norbert Stefan, Thomas Mayr, Maw Maw Hliang, Kathleen Jablonski, Maegan Harden, Alena Stančáková, Markku Laakso, Hans-Ulrich Haring, Axel Ullrich, and Sylvia L. Asa

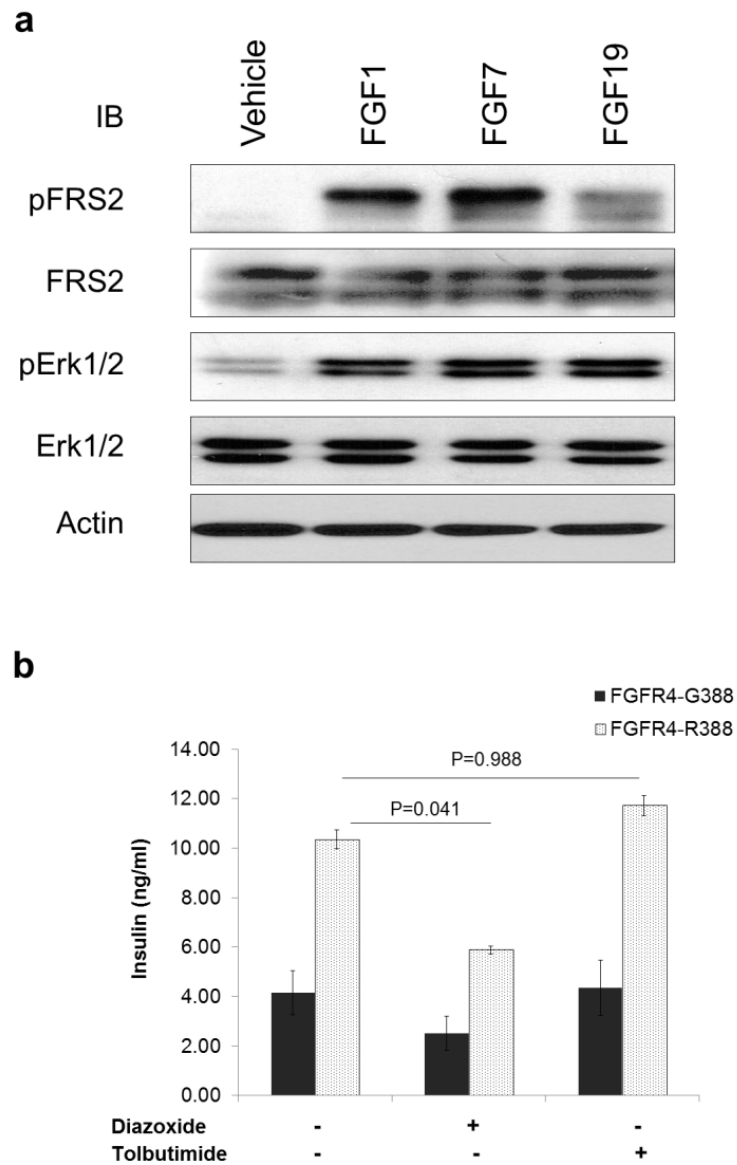

**Figure S1. Pancreatic islet responses to stimulation, Related to Figure 1**

(a) Pancreatic islet RINm5F cells response to FGF stimulation. After overnight serum-deprivation, cells were exposed for 15 minutes in serum-free media in the presence of heparin without or with the non-FGFR selective FGF1, the FGFR2-selective FGF7, or the FGFR4-selective FGF19 ligands.

Signaling responses were tracked using the immediate FGFR substrate (pFRS2) and with MAPK (pErk1/2). (b) RINm5F cells were treated with diazoxide (100  $\mu$ M) or tolbutamide (100  $\mu$ M) for 20 min. followed by 30 min. of glucose (20 mM) exposure as indicated. *FGFR4-R388* cells show greater inhibition to diazoxide but similar responses to tolbutamide compared to *FGFR4-G388* cells. Values represent mean+SEM from triplicate treatments in 2 separate experiments.

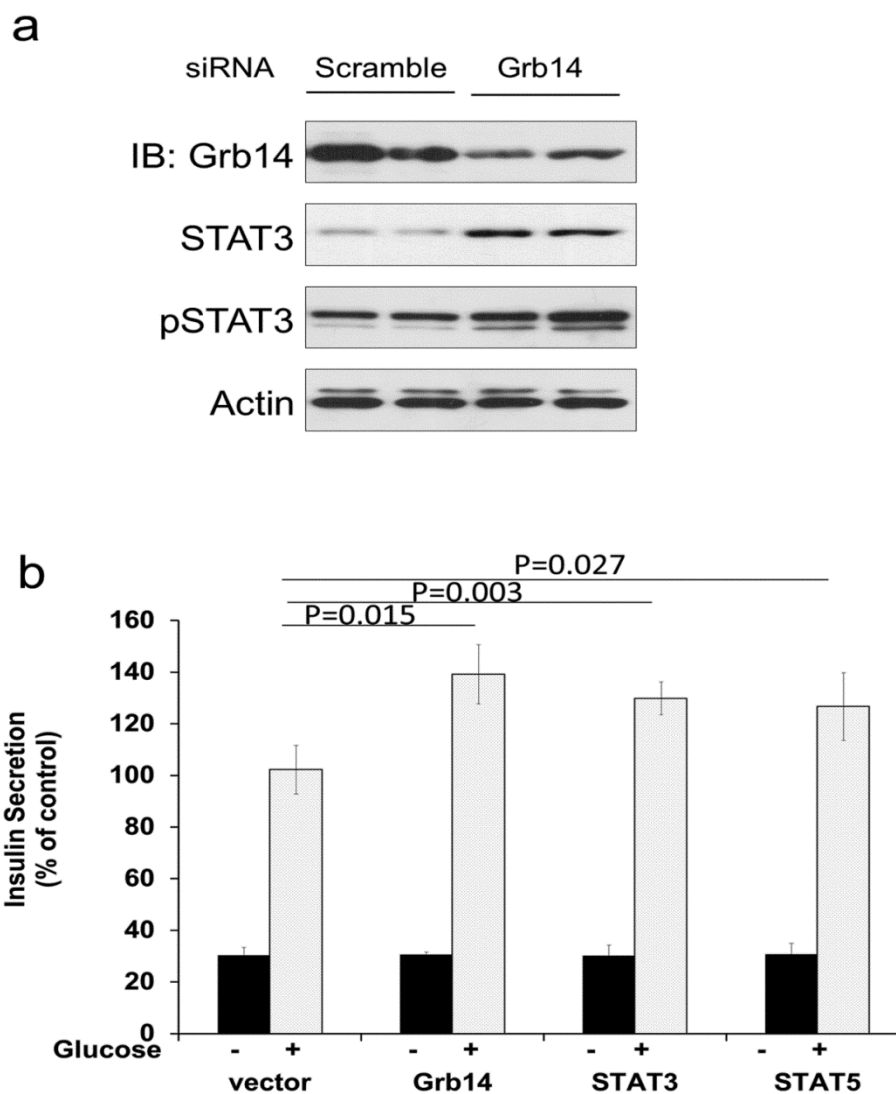

**Figure S2. Impact of Grb14, STAT3, or STAT5 on pancreatic islet cells, Related to Figure 3**

(a) Native pancreatic islet RIN cells were down-regulated for Grb14 expression using two independent siRNA oligonucleotides targeting the adaptor protein. Western blotting demonstrates effective Grb14 reduction (siRNA) compared with scrambled control (scramble). Each lane represents cells grown without and with glucose respectively. The reduction in Grb14 is associated with STAT3 up-regulation. (b) Pancreatic islet MIN6 cells were forced to express Grb14, STAT3, or STAT5 as indicated for assessment of insulin secretion. Cells were removed from glucose (-) for 3 hours for synchronization followed by another 3 hours of exposure to 25 mM (+) glucose as indicated. Values represent mean+SEM from 4-6 wells per plasmid performed in 2 separate experiments.

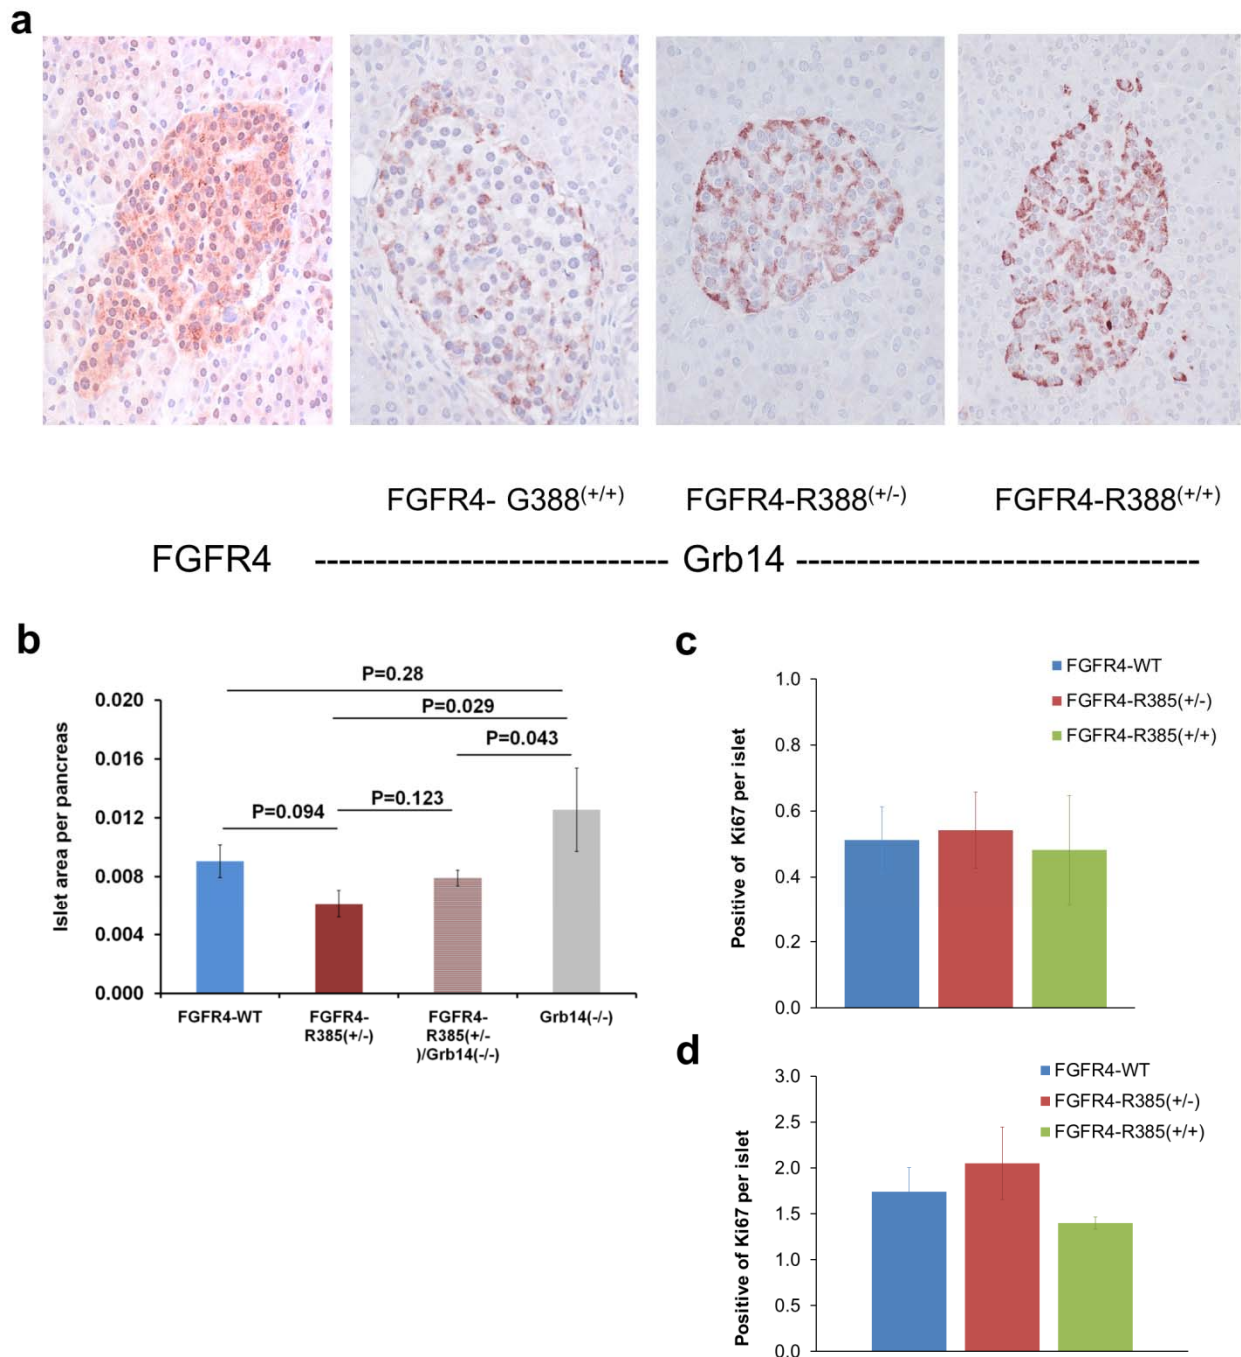

**Figure S3. Primary human and mouse pancreatic islet morphology, Related to Figure 5**

(a) Primary human pancreatic islet FGFR4 and Grb14 expression. FGFR4 staining was evident by immunostaining in human islets independent of codon 388 genotype. *FGFR4-WT* islets show Grb14 staining mainly in the periphery of the islets. *FGFR4-R388<sup>(+/-)</sup>* islets show enhanced Grb14 staining within the rest of the islets; a feature most evident in *FGFR4-R388<sup>(+/+)</sup>* islets. (b) Pancreatic islet morphology in *FGFR4* knock-in Mice. Six month old male mice (8-10/genotype) were subjected to quantitative morphologic assessments. For morphometric measures, total areas of pancreas and total islet areas on hematoxylin & eosin stained slides were traced using the Aperio imagescope morphometry program and the relative amount of the endocrine component was calculated. (c) To assess cell proliferation animals were maintained on regular diet or (d) high fat (60%) diet for 6 weeks after which pancreatic tissues were harvested for Ki-67 staining and image analysis quantification. Values represent the mean+SEM with group comparisons tested by ANOVA.

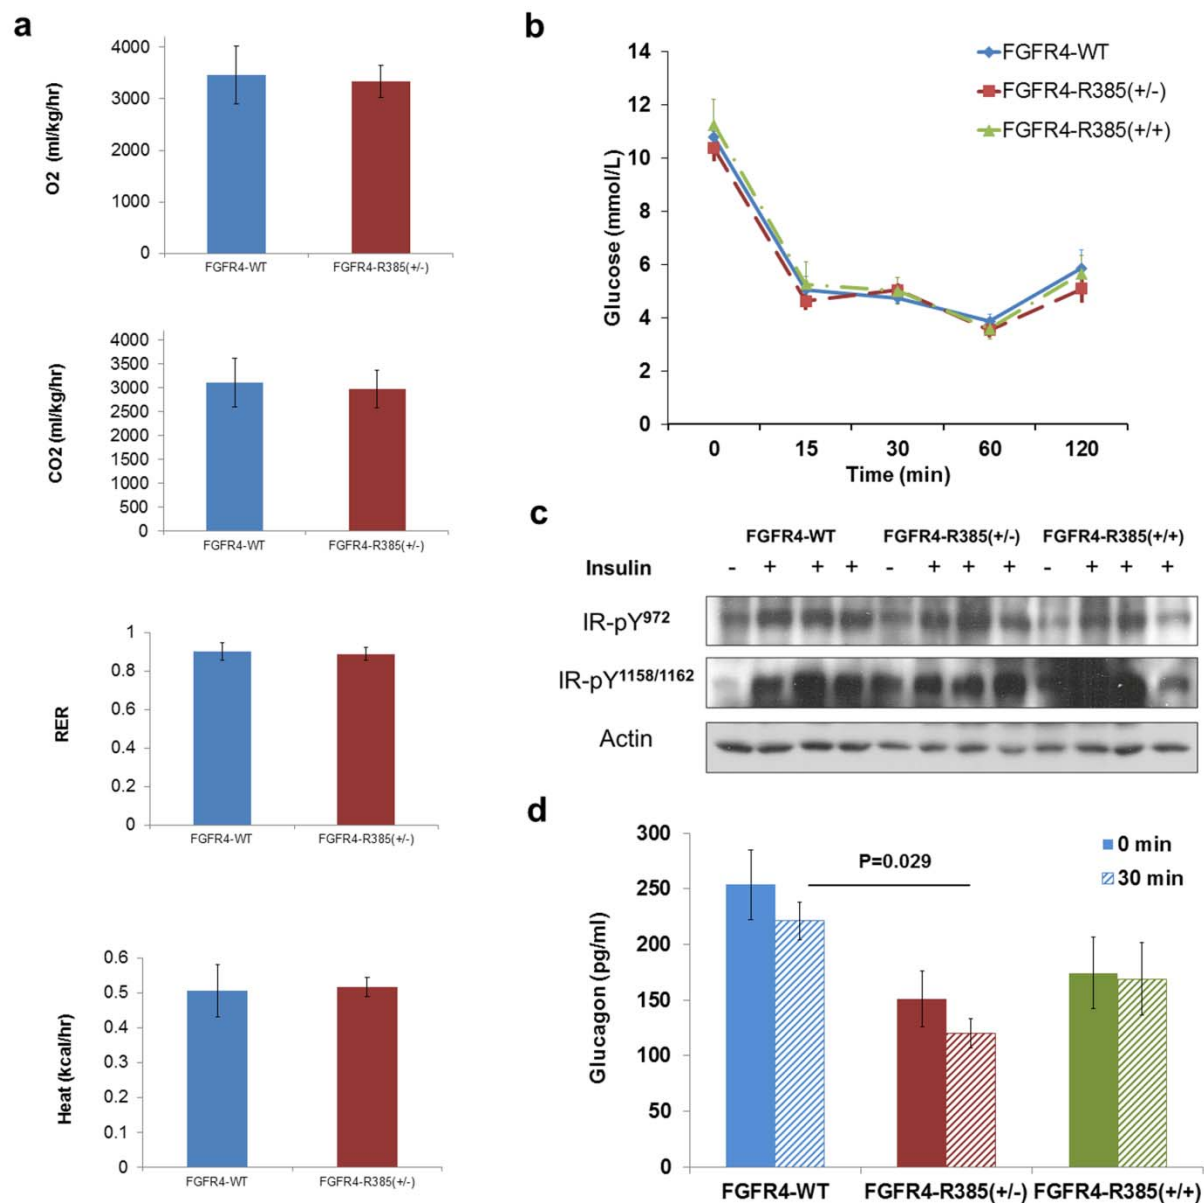

**Figure S4. *FGFR4* knock-in mouse metabolic requirements and response to insulin, Related to Figure 6**

(a) Metabolic requirements of *FGFR4* knock-in mice. To measure energy homeostasis, 6 month old *FGFR4* knock-in mice of the indicated genotypes were monitored for multiple parameters of energy expenditure over a 24 hour period in an indirect calorimeter chamber. Bar graphs represent mean+SEM of oxygen consumption, CO<sub>2</sub> production, respiratory exchange rate (RER), and heat production, respectively from at least 6 mice per group. Representative tracing measurements from individual animals are shown immediately to the right. (b) Insulin tolerance testing in *FGFR4* knock-in mice. Insulin was administered at a dose of 0.075 IU/kg intraperitoneally in 6 month old male mice of the indicated *FGFR4* genotypes. At least 6 mice were included in each group. (c) Effect of insulin administration on IR phosphorylation in liver. *FGFR4* knock-in mice as in panel “b” were fasted overnight, administered insulin 0.075 IU/kg and tissue harvested within 7 minutes. Western blotting shows similar IR phosphorylation in absence (-) and presence of insulin (+) across *FGFR4* genotypes. Each lane represents an independent mouse. (d) Serum glucagon was obtained from 12 month old mice following an overnight fast and 30 minutes following glucose tolerance testing. Values represent the mean+SEM of 5 animals in each genotype.

**Table S1. Summary of Microarray Gene Profiling of Pancreatic Islet Cells Expressing *FGFR4-R388* versus *FGFR4-G388*, Related to Figure 2**

| Method                | Gene Symbol | <i>FGFR4-R388</i> vs. <i>FGFR4-G388</i> |            |         | <i>FGFR4-R388</i> vs. <i>pcDNA3.1</i> |            |         | <i>FGFR4-G388</i> vs. <i>pcDNA3.1</i> |            |         |
|-----------------------|-------------|-----------------------------------------|------------|---------|---------------------------------------|------------|---------|---------------------------------------|------------|---------|
|                       |             | Fold Change                             | regulation | p-value | Fold Change                           | regulation | p-value | Fold Change                           | regulation | p-value |
| arrayassist-<br>MASS  | Grb14       | 2.863                                   | up         | 0.0247  | 4.480                                 | up         | 0.1085  | NA                                    |            |         |
|                       | Grb14       | 2.633                                   | up         | 0.0534  | 4.478                                 | up         | 0.0937  |                                       |            |         |
|                       | FGFR1op2    | 2.100                                   | down       | 0.131   |                                       |            |         |                                       |            |         |
|                       | FGFR1       | 2.908                                   | down       | 0.0046  | 2.714                                 | down       | 0.1240  |                                       |            |         |
|                       | FGFR2       | 5.356                                   | down       | 0.296   | 2.501                                 | down       | 0.5139  | 2.141                                 | up         | 0.095   |
|                       | IGF-1R      |                                         |            |         | 2.337                                 | up         | 0.2680  | 2.024                                 | down       | 0.248   |
|                       | IGF-1R      |                                         |            |         | 2.036                                 | up         | 0.1011  |                                       |            |         |
| arrayassist-<br>PLIER | Grb14       | 2.84                                    | up         | 0.0220  | 3.390                                 | up         | 0.257   |                                       |            |         |
|                       | Fn1         | 2.38                                    | up         | 0.143   | 2.170                                 | up         | 0.18    |                                       |            |         |
| genesifter            | Grb14       | 3.05                                    | Up         | 0.040   | 5.180                                 | up         | NA      | NA                                    | NA         | NA      |
|                       | Grb14       | 2.8                                     | Up         | 0.050   | 4.970                                 | up         | NA      | NA                                    | NA         | NA      |
|                       | FGFR1       | 2.75                                    | down       | 0.009   | 2.380                                 | down       | 0.028   | NA                                    | NA         | NA      |
|                       | FGFR2       | 4.96                                    | down       |         | 6.400                                 | up         | 0.0412  | 7.84                                  | Up         | NA      |
| genespring            | Grb14       | 3.408                                   | up         | NA      | 5.736                                 | up         |         | NA                                    | NA         | NA      |
|                       | Grb14       | 3.132                                   | up         | NA      | 5.506                                 | up         |         | NA                                    | NA         | NA      |
|                       | FGFR1       | 2.46                                    | down       |         | 2.150                                 | down       | NA      | NA                                    | NA         | NA      |
|                       | FGFR2       | 4.44                                    | down       |         |                                       |            |         | 2.280                                 | up         | NA      |

**Oligonucleotide microarray analysis.** Total RNA from cultured pancreatic islet RIN cells was purified and hybridized to the Affymetrix rat 230\_2.0 Array at The Centre of Applied Genomics Hospital for Sick Children, Toronto. RNA from 6 clones (two independent *FGFR4-R388* pancreatic islet RIN clones and two independent *FGFR4-G388*, and two control (*pcDNA3.1*) clones) were subjected to in vitro transcription, labeling and hybridization using standard Affymetrix protocols. Hybridized chips scanned on an Affymetrix GeneChip 3000 confocal scanner. Raw microarray data were analyzed using 4 independent algorithms as indicated. Genes were considered to be differentially expressed if the signal consistently changed at least 2-fold (or signal log<sub>2</sub> ratio 1). The six data sets were analyzed using gene expression and statistical tools in Spotfire's DecisionSite software package. Target genes were further restricted upon filtering for a minimum of 2-fold changes in signal log ratio. Gene targets were then characterized and graphically summarized based on similar expression profiles using Hierarchal and K-Means Clustering. These clustering algorithms were able to further elucidate intrinsic grouping of the significant genes based on two different statistical methods (Hierarchal and Exclusive Clustering).

**Table S2. Relationships between the *FGFR4* rs351855 single nucleotide polymorphism with anthropometrics and metabolic traits in 6,915 non-diabetic male subjects in the Finnish METSIM study, Related to Figure 7**

| Genotype                                | G388G |               | G388R |               | R388R |               | Additive model |                       | Dominant model |                       |
|-----------------------------------------|-------|---------------|-------|---------------|-------|---------------|----------------|-----------------------|----------------|-----------------------|
|                                         | N     |               |       |               |       |               | P              | P <sub>adjusted</sub> | P              | P <sub>adjusted</sub> |
| Age                                     | 57    | (51.0, 62.0)  | 56    | (51.0, 62.0)  | 57    | (51.0, 62.0)  | 0.655          |                       | 0.869          |                       |
| Body mass index (kg/m <sup>2</sup> )    | 26.3  | (24.3, 28.8)  | 26.3  | (24.4, 28.7)  | 26.4  | (24.5, 29.4)  | 0.178          | 0.265                 | 0.731          | 0.731                 |
| Waist (cm)                              | 96.5  | (90.0, 103.5) | 96    | (90.0, 103.0) | 96    | (90.5, 104.0) | 0.709          | 0.92                  | 0.793          | 0.8                   |
| OGTT fasting plasma glucose (mmol/l)    | 5.7   | (5.4, 6.0)    | 5.7   | (5.4, 6.0)    | 5.7   | (5.4, 6.0)    | 0.487          | 0.209                 | 0.254          | 0.261                 |
| OGTT 120 min plasma glucose (mmol/l)    | 5.8   | (4.9, 7.0)    | 5.8   | (4.9, 7.0)    | 5.8   | (4.9, 7.0)    | 0.604          | 0.55                  | 0.876          | 0.743                 |
| OGTT fasting plasma insulin (mU/l)      | 6.4   | (4.5, 10.2)   | 6.4   | (4.5, 10.0)   | 6.3   | (4.4, 10.6)   | 0.938          | 0.741                 | 0.731          | 0.87                  |
| OGTT 120 min plasma insulin (mU/l)      | 34.7  | (20.3, 62.7)  | 34.4  | (20.2, 62.6)  | 34.3  | (21.0, 66.5)  | 0.905          | 0.966                 | 0.822          | 0.975                 |
| OGTT fasting plasma proinsulin (pmol/l) | 12.1  | (9.5, 15.7)   | 12.1  | (9.6, 15.6)   | 12.1  | (9.7, 16.1)   | 0.459          | 0.451                 | 0.886          | 0.722                 |
| OGTT 120 min plasma proinsulin (pmol/l) | 45.7  | (31.3, 63.2)  | 45    | (31.4, 62.5)  | 46.2  | (31.1, 64.4)  | 0.792          | 0.672                 | 0.908          | 0.75                  |
| Insulinogenic index (pmol, mmol)        | 96    | (58.2, 156.8) | 96.7  | (58.3, 159.5) | 96.3  | (57.1, 158.1) | 0.918          | 0.719                 | 0.996          | 0.917                 |
| Matsuda ISI (mg/dl, mU/l)               | 6.1   | (3.9, 9.1)    | 6.2   | (3.9, 9.0)    | 6.2   | (3.7, 9.3)    | 0.925          | 0.634                 | 0.693          | 0.801                 |
| HOMA-B                                  | 60    | (42.7, 90.0)  | 60.8  | (42.9, 91.0)  | 61.1  | (43.2, 91.6)  | 0.968          | 0.51                  | 0.953          | 0.515                 |

Data are presented as median (interquartile range). P-values were calculated using log<sub>10</sub>-transformed variables to correct for their skewed distribution. P-values are unadjusted (ANOVA for additive model, t-test for dominant model), P<sub>adjusted</sub>-values are adjusted using linear regression as follows: BMI and waist are adjusted for age, glucose levels, insulin levels, proinsulin levels, Matsuda ISI and HOMA-IR are adjusted for age and waist, Insulinogenic index and HOMA-B are adjusted for age, waist, and insulin sensitivity index (Matsuda ISI).

**Table S3. Effect of genotype at *FGFR4-R388* on diabetes incidence in the Diabetes Prevention Program, stratified by sex and treatment arm, Related to Figure 7**

|       | Placebo          |       | Metformin        |       | Lifestyle        |       |
|-------|------------------|-------|------------------|-------|------------------|-------|
|       | HR (95% CI)      | P val | HR (95% CI)      | P val | HR (95% CI)      | P val |
| Men   | 1.11 (0.79-1.57) | 0.546 | 0.59 (0.39-0.87) | 0.008 | 0.78 (0.46-1.31) | 0.340 |
| Women | 0.84 (0.65-1.10) | 0.200 | 1.00 (0.74-1.34) | 0.993 | 1.02 (0.73-1.42) | 0.901 |

Cox proportional hazard models testing the effect of genotype at *FGFR4-R388* on diabetes incidence under an additive genetic model adjusted for treatment group, sex, age at randomization and self-reported ethnicity. There was a significant SNP × treatment interaction ( $P=0.03$ ) for the placebo vs. metformin comparison in men only. HR, hazard ratio.

**Table S4. Primers used in RT-PCR, Real-time PCR, and siRNA, Related to Figure 3**

| Target                 | Gene Accession | Sequence (5'-3')                                       | Annealing temp. (°C) | Product size (base pairs) |
|------------------------|----------------|--------------------------------------------------------|----------------------|---------------------------|
| Abcc8                  | NM_013039      | F: CCTGCAGCCAGACATAGACA<br>R: CGAGAAAGGGTCATCCAAAA     | 60                   | 154                       |
| Grb14                  | NM_031623      | F: CTGCTGTTCTCCACTTACATCG<br>R: CAAAAAGGGTCCAGCTATTGTC | 60                   | 203                       |
| Grb14, Real-time       | NM_031623      | ABI Taqman Gene Expression Assays<br>Rn00581165_m1     |                      |                           |
| Grb14, siRNA           | NM_031623      | F: GGACAGTGGAGGACCATGATT<br>R: TCATGGTCTCCACTGTCCTT    |                      |                           |
| Grb7                   | NM_053403      | F: CTCTAAGGACCCGAGACACCTA<br>R: GTGGAGACCCCAAATACGATAA | 60                   | 293                       |
| Grb10                  | XM_001053718   | F: GATGGGACAAGCAAAGTGGT<br>R: ACGATCTCATGGTCTCCAG      | 60                   | 164                       |
| HK1                    | NM_012734      | F: CACCGGCAGATTGAGGAAAC<br>R: CTCAGCCCCATTTCCATCTCT    | 60                   | 101                       |
| HK4                    | M25807.1       | CCGAGTGGCTTACAGTTCTG<br>ACCTGAGTGTGGAGATGATTC          | 60                   | 140                       |
| KCNJ11                 | NM_031358.3    | GCCATGCTGTCCCGAAAGGG<br>GGCCAGGGGACATTCCTCTGT          | 60                   | 437                       |
| KCNJ15                 | NM_13321       | CCGTTCCATCACAGAGGAGT<br>GCTTTTTGGGTCTTGCAATC           | 60                   | 119                       |
| β-Klotho               | NM_031180.2    | F: ACCTGATCAAGGCACATTCG<br>R: CTGGCAGTTGATCACGTCCT     | 60                   | 146                       |
| Insulin receptor siRNA | NM_017071      | TGAGGAATGTGGGGACGTCTT<br>GACGTCCCCACATTCCTCATT         |                      |                           |
| Insulin                | NM_0191129     | F: GTACCTGGTGTGTGGGGAAC<br>R: CCAGTTGGTAGAGGGAGCAG     | 60                   | 200                       |
| FGFR1                  | XM_346491      | F: ATCGAGGTGAATGGGAGTAAGA<br>R: TTCCAGGTACAGAGGTGAGGT  | 60                   | 253                       |
| FGFR2                  | Z35139         | F: GGGACGTAGAATTTGTCTGC<br>R: TATCCCCAGCATCCATCTC      | 58                   | 199                       |
| FGFR3                  | NM_053429      | F: GAACTCCAACACACCTCTCGTC<br>R: CTTGTCAGTCGCATCATCTTTC | 59                   | 259                       |
| FGFR4                  | NM_001109904   | F: CAGGAGACACCAGCCTTCTC<br>R: GGACAGCGGAATTTGACAGT     | 60                   | 473                       |
| PGK1                   | BC063161       | F: GCTGACAAGTTTGATGAGAAT<br>R: AGGACTTTACCTTCCAGGAGC   | 57                   | 338                       |

F, forward primer. R, reverse primer.

**Table S5. List of antibodies, Related to Figure 4**

| <b>Antibody Name</b>              | <b>Source</b>             | <b>Host</b> | <b>Working Dilution</b> |
|-----------------------------------|---------------------------|-------------|-------------------------|
| Actin                             | Sigma                     | Mouse       | 1:1000                  |
| FGFR4                             | Santa Cruz Biotechnology  | Rabbit      | 1:1000                  |
| FRS2                              | R&D systems               | mouse       | 1:1000                  |
| Grb14                             | Chemicon                  | Rabbit      | 1:1000                  |
| HK1                               | ABCAM                     | mouse       | 1:1000                  |
| Insulin                           | Biomeda                   | Rabbit      | 1:1000                  |
| Insulin Receptor $\alpha$ subunit | Santa Cruz Biotechnology  | Rabbit      | 1:1000                  |
| Insulin Receptor $\beta$ subunit  | Upstate                   | Rabbit      | 1:1000                  |
| IRS1                              | Upstate                   | Rabbit      | 1:1000                  |
| IRS2                              | Upstate                   | Rabbit      | 1:1000                  |
| KCNJ11                            | ABCAM                     | Rabbit      | 1:1000                  |
| $\beta$ -Klotho (KLB)             | Lifespan Biosciences      | Rabbit      | 1:1000                  |
| MAPK                              | Sigma                     | Rabbit      | 1:40000                 |
| Phospho-FGFR (Y653/654)           | Cell Signaling Technology | Rabbit      | 1:1000                  |
| Phospho-FRS2 (Y196)               | Cell Signaling Technology | Rabbit      | 1:1000                  |
| Phospho-IR<br>(Y1158/1162/1163)   | Biosource                 | Rabbit      | 1:1000                  |
| Phospho-IR (Y972)                 | Biosource                 | Rabbit      | 1:1000                  |
| Phospho-IRS1(S312)                | Biosource                 | Rabbit      | 1:1000                  |
| Phospho-IRS1(Y612)                | Biosource                 | Rabbit      | 1:1000                  |
| Phospho-MAPK                      | Sigma                     | Mouse       | 1:4000                  |
| Phospho-PLC $\gamma$ (Y783)       | Cell Signaling Technology | Rabbit      | 1:1000                  |
| Phospho-STAT3 (Y705)              | Cell Signaling Technology | Rabbit      | 1:1000                  |
| Phospho-STAT5 (Y694)              | Cell Signaling Technology | Rabbit      | 1:1000                  |
| Phosphotyrosine, 4G10             | Upstate                   | Mouse       | 1:1000                  |
| Phosphotyrosine, PY20             | Upstate                   | Mouse       | 1:1000                  |
| PLC $\gamma$                      | Cell Signaling Technology | Rabbit      | 1:1000                  |
| STAT3                             | Cell Signaling Technology | Rabbit      | 1:1000                  |
| STAT5                             | Cell Signaling Technology | Rabbit      | 1:1000                  |



## Supplemental Experimental Procedures

### Pharmacologic treatments

FGF stimulation was performed using the non-FGFR isotype selective FGF-1 (Sigma, 10 ng/ml; St. Louis MO), the FGFR2-selective FGF7 (10 ng/ml, Sigma), or the FGFR4-selective FGF19 (10 ng/ml; R&D Systems) in serum-free defined media containing 10 U/ml heparin. To probe ATP-sensitive K<sup>+</sup> channel activity, cells were treated with diazoxide (100 μM) or tolbutamide (100 μM)(Sigma) for 20 min. followed by glucose exposure (20 mM) for 30 min.

### Pancreatic islet morphology

Cell pellets and tissue blocks were embedded for routine histology and immunohistochemistry. Immunoreaction of primary antibodies is listed in Suppl. table S5. Cell proliferation was examined by Ki-67 and BrdU staining, apoptosis was determined using the terminal deoxynucleotidyl transferase TDT-mediated deoxyuridine-triphosphate nick-end labeling (TUNEL) technique. For morphometric studies, total areas of pancreas and total islet areas on hematoxylin & eosin (H&E) stained slides were traced using the Aperio imagescope morphometry program and the relative amount of the endocrine component was calculated.

### Glucose tolerance, insulin tolerance, and energy homeostasis testing

Fasting blood glucose from tail veins was measured following an overnight fast using a glucose meter. For glucose tolerance 20%D-glucose was injected into the peritoneal cavity at a dose of 1.5 g/kg for 2 hour testing. For insulin tolerance testing, insulin (0.5-1 U/kg) was injected into the peritoneal cavity. For tissue phosphorylation studies, animals were sacrificed within 7 minutes following insulin administration. To measure energy homeostasis, animals were monitored for multiple parameters of energy expenditure over a 24 hour period in an indirect calorimeter chamber (Columbus Instruments, Columbus, OH). At least 6-12 mice were included in each experiment as indicated.

### Human studies

Data from Southern German subjects without diabetes included participants in an ongoing study to reduce adiposity and prevent type 2 diabetes (Kantartzis et al., 2011). Informed written consent was obtained from all participants following local Medical Ethics Committees' approval. Results from the MAGIC meta-analyses of fasting glycemic traits have been published (Dupuis et al., 2010; Strawbridge et al., 2011) and are available at [www.magicinvestigators.org](http://www.magicinvestigators.org). The design and results of the Diabetes Prevention Program (DPP) have also been published (Knowler et al., 2002). Briefly, this clinical trial enrolled 3,819 overweight participants with elevated fasting glucose and impaired glucose tolerance, and randomized them to placebo, an intensive lifestyle modification program, metformin 850 mg twice daily or troglitazone 400 mg once daily (the troglitazone arm was discontinued after an average of 10 months follow-up due to hepatotoxicity; troglitazone participants are only analyzed for baseline characteristics here). The principal endpoint was the development of diabetes by ADA criteria. At baseline the participants' mean age was 51 years, mean BMI was 34.0 kg/m<sup>2</sup>, 68% were women, and 45% belonged to U.S. ethnic minority groups (African American, Hispanic, Asian and American Indian). After a mean 2.8 years of follow-up, the lifestyle and metformin interventions reduced the incidence of diabetes by 58% and 31% respectively versus placebo. For the purposes of this study, 3,543 participants provided DNA and consented to genetic investigation. All procedures were approved by institutional review boards at the 27 study sites. We genotyped rs351855 on a Sequenom iPLEX platform as described (Florez et al., 2006); genotyping success rate was 94%.

## **Statistical analyses**

Data are shown as mean+standard error (SEM) with comparisons using t-tests. Multiple group comparisons were performed by ANOVA with a statistical threshold of 0.05. For the human studies statistical comparison of continuous variables was performed using logarithmically transformed data (for non-normally distributed parameters). Multivariate linear and logistic regression models were used to determine relationships of the SNP with the parameters of interest. We evaluated the effects of genotype on diabetes incidence by Cox proportional hazard models under additive genetic coding, and tested for genotype  $\times$  treatment interaction. We used general linear models to test log-transformed quantitative glycemic traits at 1 year.

## **Acknowledgements for the DPP**

The Investigators gratefully acknowledge the commitment and dedication of the participants of the DPP (see appendix for list of participants). The National Institute of Diabetes and Digestive and Kidney Diseases (NIDDK) of the National Institutes of Health provided funding to the clinical centers and the Coordinating Center for the design and conduct of the study; collection, management, analysis, and interpretation of the data. The Southwestern American Indian Centers were supported directly by the NIDDK and the Indian Health Service. The General Clinical Research Center Program, National Center for Research Resources, and the Department of Veterans Affairs supported data collection at many of the clinical centers. Funding for data collection and participant support was also provided by the Office of Research on Minority Health, the National Institute of Child Health and Human Development, the National Institute on Aging, the Office of Research on Women's Health, the Centers for Disease Control and Prevention, and the American Diabetes Association. Bristol-Myers Squibb and Parke-Davis provided medication. This research was also supported, in part, by the intramural research program of the NIDDK. LifeScan Inc., Health O Meter, Hoechst Marion Roussel, Inc., Merck-Medco Managed Care, Inc., Merck and Co., Nike Sports Marketing, Slim Fast Foods Co., and Quaker Oats Co. donated materials, equipment, or medicines for concomitant conditions. McKesson BioServices Corp., Matthews Media Group, Inc., and the Henry M. Jackson Foundation provided support services under subcontract with the Coordinating Center. The opinions expressed are those of the investigators and do not necessarily reflect the views of the Indian Health Service or other funding agencies. A complete list of Centers, investigators, and staff can be found in the Appendix.

## **APPENDIX: List of DPP investigators**

### **Pennington Biomedical Research Center (Baton Rouge, LA)**

George A. Bray, MD\*

Iris W. Culbert, BSN, RN, CCRC\*\*

Catherine M. Champagne, PhD, RD

Barbara Eberhardt, RD, LDN

Frank Greenway, MD

Fonda G. Guillory, LPN

April A. Herbert, RD

Michael L. Jeffers, LPN

Betty M. Kennedy, MPA

Jennifer C. Lovejoy, PhD

Laura H. Morris, BS

Lee E. Melancon, BA, BS

Donna Ryan, MD

Deborah A. Sanford, LPN  
Kenneth G. Smith, BS, MT  
Lisa L. Smith, BS  
Julia A. St.Amant, RTR  
Richard T. Tulley, PhD  
Paula C. Vicknair, MS, RD  
Donald Williamson, PhD  
Jeffery J. Zachwieja, PhD

**University of Chicago (Chicago, IL)**

Kenneth S. Polonsky, MD\*  
Janet Tobian, MD, PhD\*  
David Ehrmann, MD\*  
Margaret J. Matulik, RN, BSN\*\*  
Bart Clark, MD  
Kirsten Czech, MS  
Catherine DeSandre, BA  
Ruthanne Hilbrich, RD  
Wylie McNabb, EdD  
Ann R. Semenske, MS, RD

**Jefferson Medical College (Philadelphia, PA)**

Jose F. Caro, MD\*  
Pamela G. Watson, RN, ScD\*  
Barry J. Goldstein, MD, PhD\*  
Kellie A. Smith, RN, MSN\*\*  
Jewel Mendoza, RN, BSN\*\*  
Renee Liberoni, MPH  
Constance Pepe, MS, RD  
John Spandorfer, MD

**University of Miami (Miami, FL)**

Richard P. Donahue, PhD\*  
Ronald B. Goldberg, MD\*  
Ronald Prineas, MD, PhD\*  
Patricia Rowe, MPA\*\*  
Jeanette Calles, MSED  
Paul Cassanova-Romero, MD  
Hermes J. Florez, MD  
Anna Giannella, RD, MS  
Lascelles Kirby, MS  
Carmen Larreal  
Valerie McLymont, RN  
Jadell Mendez  
Juliet Ojito, RN  
Arlette Perry, PhD  
Patrice Saab, PhD

**The University of Texas Health Science Center (San Antonio, TX)**

Steven M. Haffner, MD, MPH\*  
Maria G. Montez, RN, MSHP, CDE\*\*  
Carlos Lorenzo, MD, PhD  
Arlene Martinez, RN, BSN, CDE

**University of Colorado (Denver, CO)**

Richard F. Hamman, MD, DrPH\*  
Patricia V. Nash, MS\*\*  
Lisa Testaverde, MS\*\*  
Denise R. Anderson, RN, BSN  
Larry B. Ballonoff, MD

Alexis Bouffard, MA,  
B. Ned Calonge, MD, MPH  
Lynne Delve  
Martha Farago, RN  
James O. Hill, PhD  
Shelley R. Hoyer, BS  
Bonnie T. Jortberg, MS, RD, CDE  
Dione Lenz, RN, BSN  
Marsha Miller, MS, RD  
David W. Price, MD  
Judith G. Regensteiner, PhD  
Helen Seagle, MS, RD  
Carissa M. Smith, BS  
Sheila C. Steinke, MS  
Brent VanDorsten, PhD

**Joslin Diabetes Center (Boston, MA)**

Edward S. Horton, MD\*  
Kathleen E. Lawton, RN\*\*  
Ronald A. Arky, MD  
Marybeth Bryant  
Jacqueline P. Burke, BSN  
Enrique Caballero, MD  
Karen M. Callaphan, BA  
Om P. Ganda, MD  
Therese Franklin  
Sharon D. Jackson, MS, RD, CDE  
Alan M. Jacobsen, MD  
Lyn M. Kula, RD  
Margaret Kocal, RN, CDE  
Maureen A. Malloy, BS  
Maryanne Nicosia, MS, RD  
Cathryn F. Oldmixon, RN  
Jocelyn Pan, BS, MPH  
Marizel Quitingon  
Stacy Rubtchinsky, BS  
Ellen W. Seely, MD  
Dana Schweizer, BSN  
Donald Simonson, MD  
Fannie Smith, MD  
Caren G. Solomon, MD, MPH  
James Warram, MD

**VA Puget Sound Health Care System and University of Washington (Seattle, WA)**

Steven E. Kahn, MB, ChB\*  
Brenda K. Montgomery, RN, BSN, CDE\*\*  
Wilfred Fujimoto, MD  
Robert H. Knopp, MD  
Edward W. Lipkin, MD  
Michelle Marr, BA  
Dace Trence, MD

**University of Tennessee (Memphis, TN)**

Abbas E. Kitabchi, PhD, MD, FACP\*  
Mary E. Murphy, RN, MS, CDE, MBA\*\*  
William B. Applegate, MD, MPH  
Michael Bryer-Ash, MD  
Sandra L. Frieson, RN  
Raed Imseis, MD  
Helen Lambeth, RN, BSN

Lynne C. Lichtermann, RN, BSN  
Hooman Oktaei, MD  
Lily M.K. Rutledge, RN, BSN  
Amy R. Sherman, RD, LD  
Clara M. Smith, RD, MHP, LDN  
Judith E. Soberman, MD  
Beverly Williams-Cleaves, MD

**Northwestern University's Feinberg School of Medicine (Chicago, IL)**

Boyd E. Metzger, MD\*  
Mariana K. Johnson, MS, RN\*\*  
Catherine Behrends  
Michelle Cook, MS  
Marian Fitzgibbon, PhD  
Mimi M. Giles, MS, RD  
Deloris Heard, MA  
Cheryl K.H. Johnson, MS, RN  
Diane Larsen, BS  
Anne Lowe, BS  
Megan Lyman, BS  
David McPherson, MD  
Mark E. Molitch, MD  
Thomas Pitts, MD  
Renee Reinhart, RN, MS  
Susan Roston, RN, RD  
Pamela A. Schinleber, RN, MS

**Massachusetts General Hospital (Boston, MA)**

David M. Nathan, MD\*  
Charles McKittrick, BSN\*\*  
Heather Turgeon, BSN\*\*  
Kathy Abbott  
Ellen Anderson, MS, RD  
Laurie Bissett, MS, RD  
Enrico Cagliero, MD  
Linda Delahanty, MS, RD  
Valerie Goldman, MS, RD  
Alexandra Poulos

**University of California-San Diego (San Diego, CA)**

Jerrold M. Olefsky, MD\*  
Mary Lou Carrion-Petersen, RN, BSN\*\*  
Elizabeth Barrett-Connor, MD  
Steven V. Edelman, MD  
Robert R. Henry, MD  
Javiva Horne, RD  
Simona Szerdi Janesch, BA  
Diana Leos, RN, BSN  
Sundar Mudaliar, MD  
William Polonsky, PhD  
Jean Smith, RN  
Karen Vejvoda, RN, BSN, CDE, CCRC

**St. Luke's-Roosevelt Hospital (New York, NY)**

F. Xavier Pi-Sunyer, MD\*  
Jane E. Lee, MS\*\*  
David B. Allison, PhD  
Nancy J. Aronoff, MS, RD  
Jill P. Crandall, MD  
Sandra T. Foo, MD

Carmen Pal, MD  
Kathy Parkes, RN  
Mary Beth Pena, RN  
Ellen S. Rooney, BA  
Gretchen E.H. Van Wye, MA  
Kristine A. Viscovich, ANP

**Indiana University (Indianapolis, IN)**

David G. Marrero, PhD\*  
Melvin J. Prince, MD\*  
Susie M. Kelly, RN, CDE\*\*  
Yolanda F. Dotson, BS  
Edwin S. Fineberg, MD  
John C. Guare, PhD  
Angela M. Hadden  
James M. Ignaut, MA  
Marcia L. Jackson  
Marion S. Kirkman, MD  
Kieren J. Mather, MD  
Beverly D. Porter, MSN  
Paris J. Roach, MD  
Nancy D. Rowland, BS, MS  
Madelyn L. Wheeler, RD

**Medstar Research Institute (Washington, DC)**

Robert E. Ratner, MD\*  
Gretchen Youssef, RD, CDE\*\*  
Sue Shapiro, RN, BSN, CCRC\*\*  
Catherine Bavido-Arrage, MS, RD, LD  
Geraldine Boggs, MSN, RN  
Marjorie Bronsord, MS, RD, CDE  
Ernestine Brown  
Wayman W. Cheatham, MD  
Susan Cola  
Cindy Evans  
Peggy Gibbs  
Tracy Kellum, MS, RD, CDE  
Claresa Levatan, MD  
Asha K. Nair, BS  
Maureen Passaro, MD  
Gabriel Uwaifo, MD

**University of Southern California/UCLA Research Center (Alhambra, CA)**

Mohammed F. Saad, MD\*  
Maria Budget\*\*  
Sujata Jinagouda, MD\*\*  
Khan Akbar, MD  
Claudia Conzues  
Perpetua Magpuri  
Kathy Ngo  
Amer Rassam, MD  
Debra Waters  
Kathy Xaphthalmous

**Washington University (St. Louis, MO)**

Julio V. Santiago, MD\* (deceased)  
Samuel Dagogo-Jack, MD, MSc, FRCP, FACP\*  
Neil H. White, MD, CDE\*  
Samia Das, MS, MBA, RD, LD\*\*  
Ana Santiago, RD\*\*

Angela Brown, MD  
Edwin Fisher, PhD  
Emma Hurt, RN  
Tracy Jones, RN  
Michelle Kerr, RD  
Lucy Ryder, RN  
Cormarie Wernimont, MS, RD

**Johns Hopkins School of Medicine (Baltimore, MD)**

Christopher D. Saudek, MD\*  
Vanessa Bradley, BA\*\*  
Emily Sullivan, MEd, RN\*\*  
Tracy Whittington, BS\*\*  
Caroline Abbas  
Frederick L. Brancati, MD, MHS  
Jeanne M. Clark, MD  
Jeanne B. Charleston, RN, MSN  
Janice Freel  
Katherine Horak, RD  
Dawn Jiggetts  
Deloris Johnson  
Hope Joseph  
Kimberly Loman  
Henry Mosley  
Richard R. Rubin, PhD  
Alafia Samuels, MD  
Kerry J. Stewart, EdD  
Paula Williamson

**University of New Mexico (Albuquerque, NM)**

David S. Schade, MD\*  
Karwyn S. Adams, RN, MSN\*\*  
Carolyn Johannes, RN, CDE\*\*  
Leslie F. Adler, PhD  
Patrick J. Boyle, MD  
Mark R. Burge, MD  
Janene L. Canady, RN, CDE  
Lisa Chai, RN  
Ysela Gonzales, RN, MSN  
Doris A. Hernandez-McGinnis  
Patricia Katz, LPN  
Carolyn King  
Amer Rassam, MD  
Sofya Rubinchik, MD  
Willette Senter, RD  
Debra Waters, PhD

**Albert Einstein College of Medicine (Bronx, NY)**

Harry Shamoon, MD\*  
Janet O. Brown, RN, MPH, MSN\*\*  
Elsie Adorno, BS  
Liane Cox, MS, RD  
Jill Crandall, MD  
Helena Duffy, MS, C-ANP  
Samuel Engel, MD  
Allison Friedler, BS  
Crystal J. Howard-Century, MA  
Stacey Kloiber, RN  
Nadege Longchamp, LPN  
Helen Martinez, RN, MSN, FNP-C

Dorothy Pompei, BA  
Jonathan Scheindlin, MD  
Elissa Violino, RD, MS  
Elizabeth Walker, RN, DNSc, CDE  
Judith Wylie-Rosett, EdD, RD  
Elise Zimmerman, RD, MS  
Joel Zonszein, MD

**University of Pittsburgh (Pittsburgh, PA)**

Trevor Orchard, MD\*  
Rena R. Wing, PhD\*  
Gaye Koenning, MS, RD\*\*  
M. Kaye Kramer, BSN, MPH\*\*  
Susan Barr, BS  
Miriam Boraz  
Lisa Clifford, BS  
Rebecca Culyba, BS  
Marlene Frazier  
Ryan Gilligan, BS  
Susan Harrier, MLT  
Louann Harris, RN  
Susan Jeffries, RN, MSN  
Andrea Kriska, PhD  
Qurashia Manjoo, MD  
Monica Mullen, MHP, RD  
Alicia Noel, BS  
Amy Otto, PhD  
Linda Semler, MS, RD  
Cheryl F. Smith, PhD  
Marie Smith, RN, BSN  
Elizabeth Venditti, PhD  
Valarie Weinzierl, BS  
Katherine V. Williams, MD, MPH  
Tara Wilson, BA

**University of Hawaii (Honolulu, HI)**

Richard F. Arakaki, MD\*  
Renee W. Latimer, BSN, MPH\*\*  
Narleen K. Baker-Ladao, BS  
Ralph Beddow, MD  
Lorna Dias, AA  
Jillian Inouye, RN, PhD  
Marjorie K. Mau, MD  
Kathy Mikami, BS, RD  
Pharis Mohideen, MD  
Sharon K. Odom, RD, MPH  
Raynette U. Perry, AA

**Southwest American Indian Centers (Phoenix, AZ; Shiprock, NM; Zuni, NM)**

William C. Knowler, MD, DrPH\*<sup>+</sup>  
Norman Coeoyate\*\*  
Mary A. Hoskin, RD, MS\*\*  
Carol A. Percy, RN, MS\*\*  
Kelly J. Acton, MD, MPH  
Vickie L. Andre, RN, FNP  
Roselyn Barber  
Shandiin Begay, MPH  
Peter H. Bennett, MB, FRCP  
Mary Beth Benson, RN, BSN  
Evelyn C. Bird, RD, MPH



Brenda A. Broussard, RD, MPH, MBA, CDE  
Marcella Chavez, RN, AS  
Tara Dacawyma  
Matthew S. Doughty, MD  
Roberta Duncan, RD  
Cyndy Edgerton, RD  
Jacqueline M. Ghahate  
Justin Glass, MD  
Martia Glass, MD  
Dorothy Gohdes, MD  
Wendy Grant, MD  
Robert L. Hanson, MD, MPH  
Ellie Horse  
Louise E. Ingraham, MS, RD, LN  
Merry Jackson  
Priscilla Jay  
Roylen S. Kaskalla  
David Kessler, MD  
Kathleen M. Kobus, RNC-ANP  
Jonathan Krakoff, MD  
Catherine Manus, LPN  
Sara Michaels, MD  
Tina Morgan  
Yolanda Nashboo (deceased)  
Julie A. Nelson, RD  
Steven Poirier, MD  
Evette Polczynski, MD  
Mike Reidy, MD  
Jeanine Roumain, MD, MPH  
Debra Rowse, MD  
Sandra Sangster  
Janet Sewenemewa  
Darryl Tonemah, PhD  
Charlton Wilson, MD  
Michelle Yazzie

**George Washington University Biostatistics Center (DPP Coordinating Center Rockville, MD)**

Raymond Bain, PhD\*  
Sarah Fowler, PhD\*  
Tina Brenneman\*\*  
Solome Abebe  
Julie Bamdad, MS  
Jackie Callaghan  
Sharon L. Edelstein, ScM  
Yuping Gao  
Kristina L. Grimes  
Nisha Grover  
Lori Haffner, MS  
Steve Jones  
Tara L. Jones  
Richard Katz, MD  
John M. Lachin, ScD  
Pamela Mucik  
Robert Orlosky  
James Rochon, PhD  
Alla Sapozhnikova  
Hanna Sherif, MS  
Charlotte Stimpson  
Marinella Temprosa, MS  
Fredricka Walker-Murray

**Central Biochemistry Laboratory (Seattle, WA)**

Santica Marcovina, PhD, ScD\*  
Greg Strylewicz, PhD\*\*  
F. Alan Aldrich

**Epidemiological Cardiology Research Center- Epicare (Winston-Salem, NC)**

Pentti Rautaharju, MD, PhD\*  
Ronald J. Prineas, MD, PhD\*\*  
Teresa Alexander  
Charles Campbell, MS  
Sharon Hall  
Yabing Li, MD  
Margaret Mills  
Nancy Pemberton, MS  
Farida Rautaharju, PhD  
Zhuming Zhang, MD

**NIH/NIDDK (Bethesda, MD)**

R. Eastman, MD  
Judith Fradkin, MD  
Sanford Garfield, PhD

**Nutrition Coding Center (Columbia, SC)**

Elizabeth Mayer-Davis, PhD\*  
Robert R. Moran, PhD\*\*

**Quality of Well-Being Center (La Jolla, CA)**

Ted Ganiats, MD\*  
Kristin David, MHP\*  
Andrew J. Sarkin, PhD\*

**Genetics Working Group**

Jose C. Florez, MD, PhD<sup>1,2</sup>  
David Altshuler, MD, PhD<sup>1,2</sup>  
Paul I.W. de Bakker, PhD<sup>2</sup>  
Paul W. Franks, PhD, Mphil, MS<sup>3,6</sup>  
Robert L. Hanson, MD, MPH<sup>3</sup>  
Kathleen Jablonski, PhD<sup>5</sup>  
William C. Knowler, MD, DrPH<sup>3</sup>  
Jarred B. McAteer, AB<sup>1,2</sup>  
Toni I. Pollin, PhD<sup>4</sup>  
Alan R. Shuldiner, MD<sup>4</sup>

<sup>1</sup>Massachusetts General Hospital; <sup>2</sup>Broad Institute; <sup>3</sup>NIDDK; <sup>4</sup>University of Maryland; <sup>5</sup>Coordinating Center; <sup>6</sup>Umea University

\* Principal Investigator; \*\* Program Coordinator

## Supplemental References

Dupuis,J., Langenberg,C., Prokopenko,I., Saxena,R., Soranzo,N., Jackson,A.U., Wheeler,E., Glazer,N.L., Bouatia-Naji,N., Gloyn,A.L., Lindgren,C.M., Magi,R., Morris,A.P., Randall,J., Johnson,T., Elliott,P., Rybin,D., Thorleifsson,G., Steinthorsdottir,V., Henneman,P., Grallert,H., Dehghan,A., Hottenga,J.J., Franklin,C.S., Navarro,P., Song,K., Goel,A., Perry,J.R., Egan,J.M., Lajunen,T., Grarup,N., Sparso,T., Doney,A., Voight,B.F., Stringham,H.M., Li,M., Kanoni,S., Shrader,P., Cavalcanti-Proenca,C., Kumari,M., Qi,L., Timpson,N.J., Gieger,C., Zabena,C., Rocheleau,G., Ingelsson,E., An,P., O'Connell,J., Luan,J., Elliott,A., McCarroll,S.A., Payne,F., Roccascocca,R.M., Pattou,F., Sethupathy,P., Ardlie,K., Ariyurek,Y., Balkau,B., Barter,P., Beilby,J.P., Ben Shlomo,Y., Benediktsson,R., Bennett,A.J., Bergmann,S., Bochud,M., Boerwinkle,E., Bonnefond,A., Bonnycastle,L.L., Borch-Johnsen,K., Bottcher,Y., Brunner,E., Bumpstead,S.J., Charpentier,G., Chen,Y.D., Chines,P., Clarke,R., Coin,L.J., Cooper,M.N., Cornelis,M., Crawford,G., Crisponi,L., Day,I.N., de Geus,E.J., Delplanque,J., Dina,C., Erdos,M.R., Fedson,A.C., Fischer-Rosinsky,A., Forouhi,N.G., Fox,C.S., Frants,R., Franzosi,M.G., Galan,P., Goodarzi,M.O., Graessler,J., Groves,C.J., Grundy,S., Gwilliam,R., Gyllensten,U., Hadjadj,S., Hallmans,G., Hammond,N., Han,X., Hartikainen,A.L., Hassanali,N., Hayward,C., Heath,S.C., Hercberg,S., Herder,C., Hicks,A.A., Hillman,D.R., Hingorani,A.D., Hofman,A., Hui,J., Hung,J., Isomaa,B., Johnson,P.R., Jorgensen,T., Jula,A., Kaakinen,M., Kaprio,J., Kesaniemi,Y.A., Kivimaki,M., Knight,B., Koskinen,S., Kovacs,P., Kyvik,K.O., Lathrop,G.M., Lawlor,D.A., Le Bacquer,O., Lecoeur,C., Li,Y., Lyssenko,V., Mahley,R., Mangino,M., Manning,A.K., Martinez-Larrad,M.T., McAteer,J.B., McCulloch,L.J., McPherson,R., Meisinger,C., Melzer,D., Meyre,D., Mitchell,B.D., Morken,M.A., Mukherjee,S., Naitza,S., Narisu,N., Neville,M.J., Oostra,B.A., Orru,M., Pakyz,R., Palmer,C.N., Paolisso,G., Pattaro,C., Pearson,D., Peden,J.F., Pedersen,N.L., Perola,M., Pfeiffer,A.F., Pichler,I., Polasek,O., Posthuma,D., Potter,S.C., Pouta,A., Province,M.A., Psaty,B.M., Rathmann,W., Rayner,N.W., Rice,K., Ripatti,S., Rivadeneira,F., Roden,M., Rolandsson,O., Sandbaek,A., Sandhu,M., Sanna,S., Sayer,A.A., Scheet,P., Scott,L.J., Seedorf,U., Sharp,S.J., Shields,B., Sigurethsson,G., Sijbrands,E.J., Silveira,A., Simpson,L., Singleton,A., Smith,N.L., Sovio,U., Swift,A., Syddall,H., Syvanen,A.C., Tanaka,T., Thorand,B., Tichet,J., Tonjes,A., Tuomi,T., Uitterlinden,A.G., van Dijk,K.W., van Hoek,M., Varma,D., Visvikis-Siest,S., Vitart,V., Vogelzangs,N., Waeber,G., Wagner,P.J., Walley,A., Walters,G.B., Ward,K.L., Watkins,H., Weedon,M.N., Wild,S.H., Willemsen,G., Witteman,J.C., Yarnell,J.W., Zeggini,E., Zelenika,D., Zethelius,B., Zhai,G., Zhao,J.H., Zillikens,M.C., Borecki,I.B., Loos,R.J., Meneton,P., Magnusson,P.K., Nathan,D.M., Williams,G.H., Hattersley,A.T., Silander,K., Salomaa,V., Smith,G.D., Bornstein,S.R., Schwarz,P., Spranger,J., Karpe,F., Shuldiner,A.R., Cooper,C., Dedoussis,G.V., Serrano-Rios,M., Morris,A.D., Lind,L., Palmer,L.J., Hu,F.B., Franks,P.W., Ebrahim,S., Marmot,M., Kao,W.H., Pankow,J.S., Sampson,M.J., Kuusisto,J., Laakso,M., Hansen,T., Pedersen,O., and Pramstaller,P.P. (2010). New genetic loci implicated in fasting glucose homeostasis and their impact on type 2 diabetes risk. *Nat. Genet.* 42, 105-116.

Florez,J.C., Jablonski,K.A., Bayley,N., Pollin,T.I., de Bakker,P.I., Shuldiner,A.R., Knowler,W.C., Nathan,D.M., and Altshuler,D. (2006). TCF7L2 polymorphisms and progression to diabetes in the Diabetes Prevention Program. *N. Engl. J. Med.* 355, 241-250.

Kantartzis,K., Machann,J., Schick,F., Rittig,K., Machicao,F., Fritsche,A., Haring,H.U., and Stefan,N. (2011). Effects of a lifestyle intervention in metabolically benign and malignant obesity. *Diabetologia* 54, 864-868.

Knowler,W.C., Barrett-Connor,E., Fowler,S.E., Hamman,R.F., Lachin,J.M., Walker,E.A., and Nathan,D.M. (2002). Reduction in the incidence of type 2 diabetes with lifestyle intervention or

metformin. *N. Engl. J. Med.* 346, 393-403.

Strawbridge,R.J., Dupuis,J., Prokopenko,I., Barker,A., Ahlqvist,E., Rybin,D., Petrie,J.R., Travers,M.E., Bouatia-Naji,N., Dimas,A.S., Nica,A., Wheeler,E., Chen,H., Voight,B.F., Taneera,J., Kanoni,S., Peden,J.F., Turrini,F., Gustafsson,S., Zabena,C., Almgren,P., Barker,D.J., Barnes,D., Dennison,E.M., Eriksson,J.G., Eriksson,P., Eury,E., Folkersen,L., Fox,C.S., Frayling,T.M., Goel,A., Gu,H.F., Horikoshi,M., Isomaa,B., Jackson,A.U., Jameson,K.A., Kajantie,E., Kerr-Conte,J., Kuulasmaa,T., Kuusisto,J., Loos,R.J., Luan,J., Makrilakis,K., Manning,A.K., Martinez-Larrad,M.T., Narisu,N., Nastase,M.M., Ohrvik,J., Osmond,C., Pascoe,L., Payne,F., Sayer,A.A., Sennblad,B., Silveira,A., Stancakova,A., Stirrups,K., Swift,A.J., Syvanen,A.C., Tuomi,T., 't Hooft,F.M., Walker,M., Weedon,M.N., Xie,W., Zethelius,B., Ongen,H., Malarstig,A., Hopewell,J.C., Saleheen,D., Chambers,J., Parish,S., Danesh,J., Kooner,J., Ostenson,C.G., Lind,L., Cooper,C.C., Serrano-Rios,M., Ferrannini,E., Forsen,T.J., Clarke,R., Franzosi,M.G., Seedorf,U., Watkins,H., Froguel,P., Johnson,P., Deloukas,P., Collins,F.S., Laakso,M., Dermitzakis,E.T., Boehnke,M., McCarthy,M.I., Wareham,N.J., Groop,L., Pattou,F., Gloyn,A.L., Dedoussis,G.V., Lyssenko,V., Meigs,J.B., Barroso,I., Watanabe,R.M., Ingelsson,E., Langenberg,C., Hamsten,A., and Florez,J.C. (2011). Genome-wide association identifies nine common variants associated with fasting proinsulin levels and provides new insights into the pathophysiology of type 2 diabetes. *Diabetes* 60, 2624-2634.
